# Supplementary material for: Surface chemistry, morphological analysis and properties of cellulose nanocrystals with gradiented sulfation degrees
Source: Royal Society of Chemistry journal article supplement (doi:10.1039/c3nr06761k), 2014-01-01
Supplement: c3nr06761k1.pdf [file c3nr06761k1.pdf]

**Surface chemistry, morphological analysis and properties of  
cellulose nanocrystals with gradient sulfation degrees**

Ning Lin, Alain Dufresne\*

Grenoble Institute of Technology (Grenoble INP) –The International School of Paper,  
Print Media and Biomaterials (Pagora), CS10065, 38402 Saint Martin d’Hères Cedex,  
France

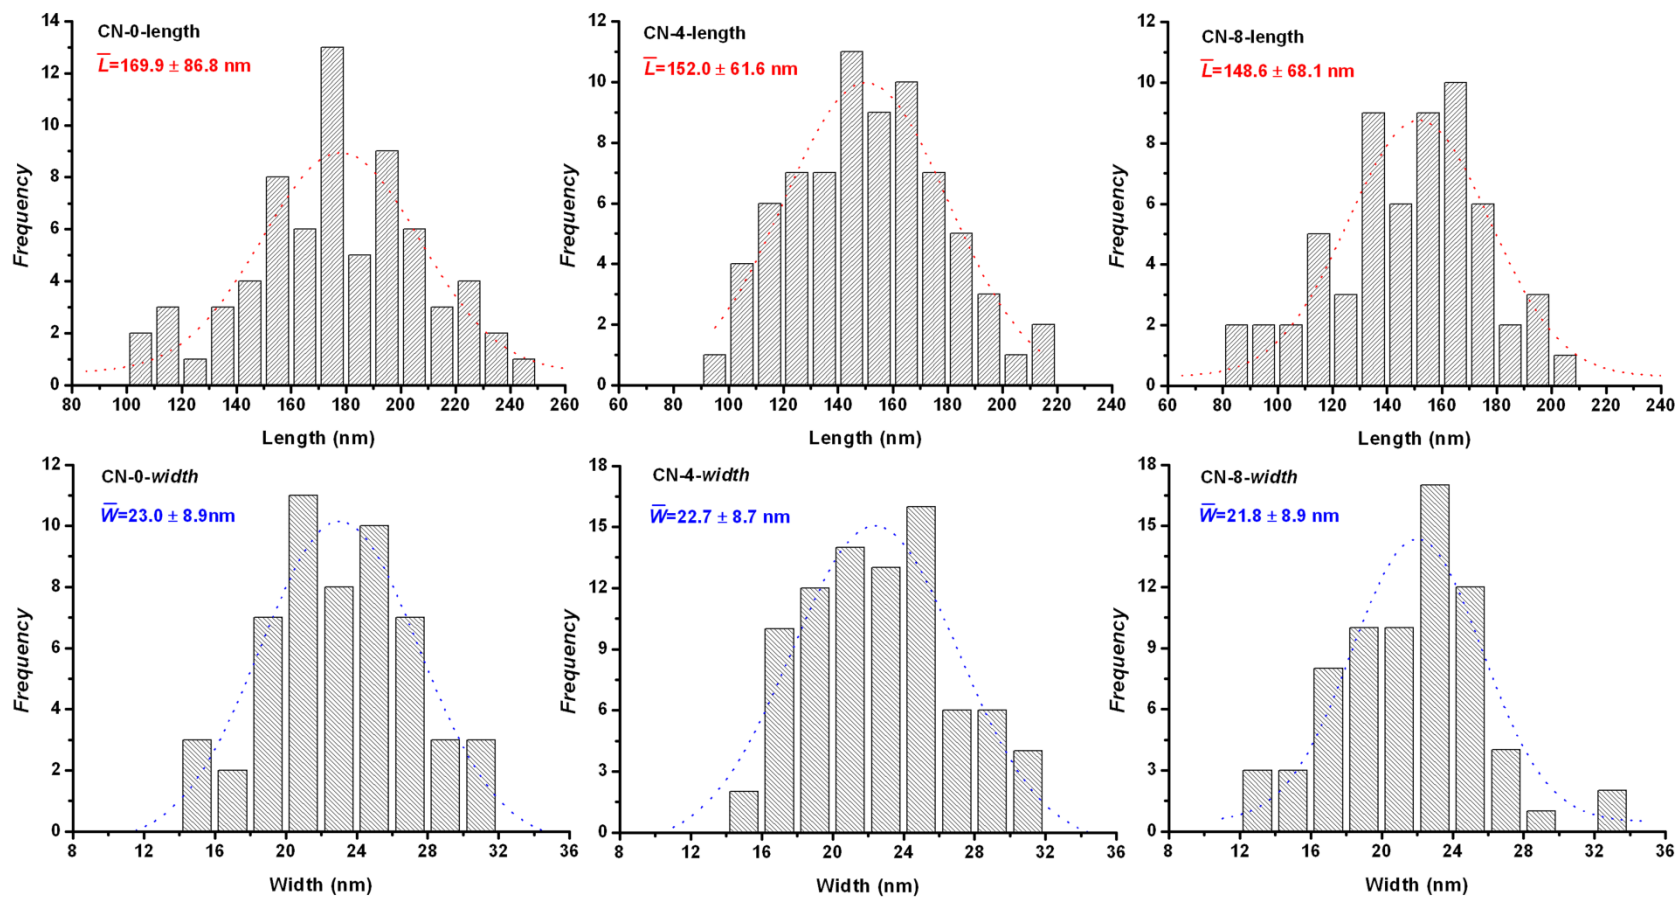

**Figure S1.** Size statistics for length ( $L$ ) and width ( $W$ ) from AFM images for cellulose nanocrystals samples (CN-0, CN-4 and CN-8); red dashed lines are Gaussian distribution fitting line according to the statistical data.

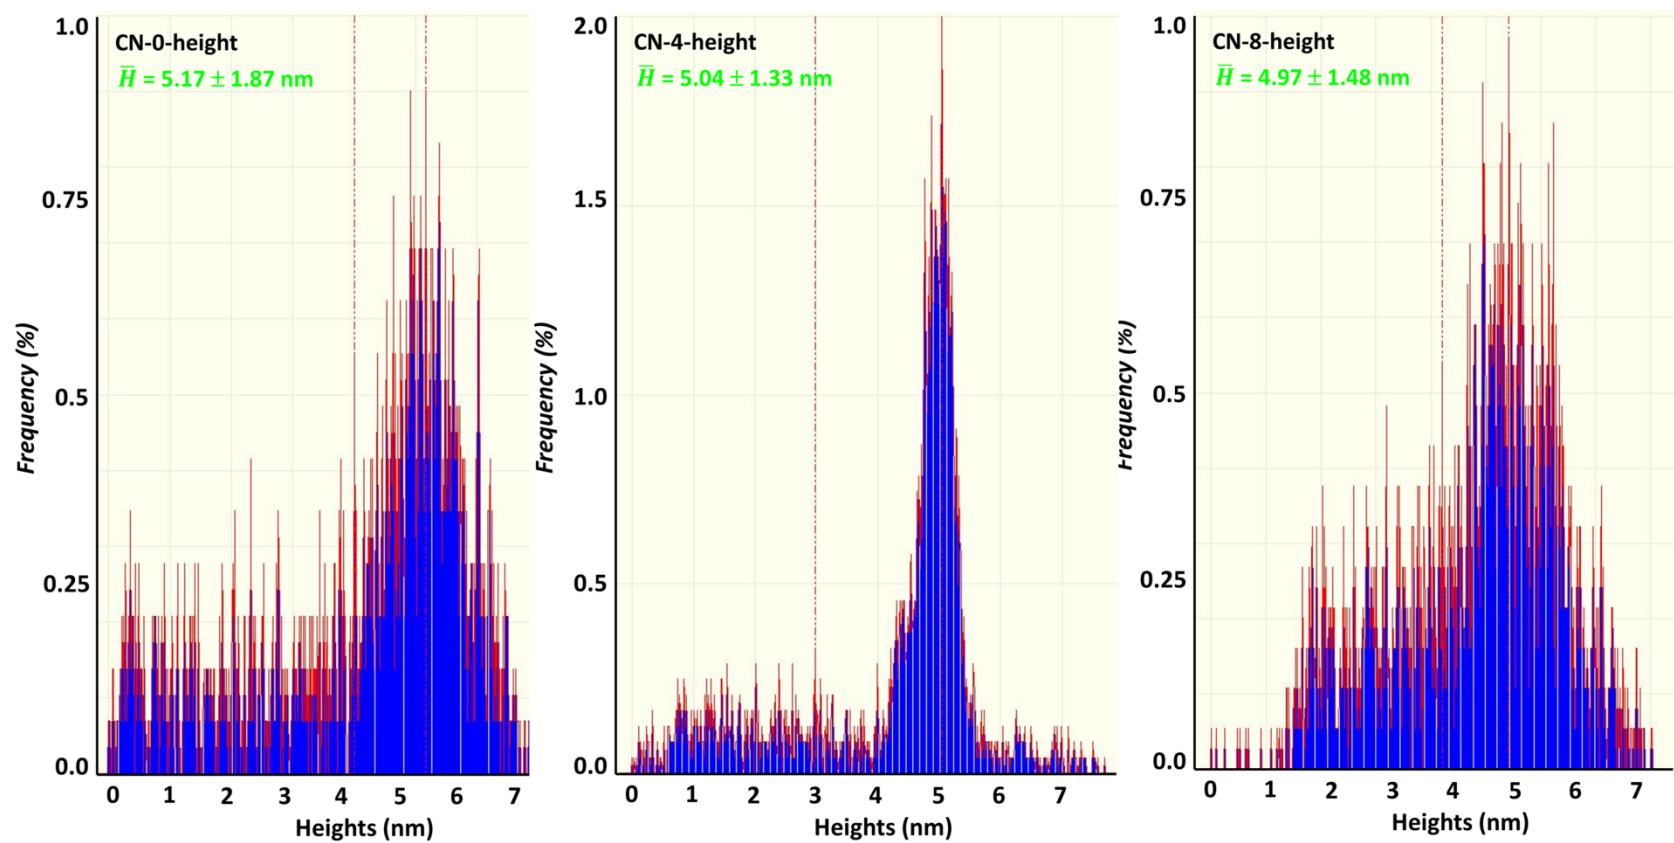

**Figure S2.** Size statistics of height ( $H$ ) for cellulose nanocrystals samples (CN-0, CN-4 and CN-8) with the analysis of NanoScope software.
